# Supplementary material for: Milk polar lipids reduce lipid cardiovascular risk factors in overweight postmenopausal women: towards a gut sphingomyelin-cholesterol interplay
Source: PubMed Central journal article supplement — Gut. 2019 Jun 12;69(3):487–501. doi: 10.1136/gutjnl-2018-318155 (PMC7034342; doi:10.1136/gutjnl-2018-318155), 2019-06-12
Supplement: gutjnl-2018-318155supp002.pdf [file gutjnl-2018-318155supp002.pdf]

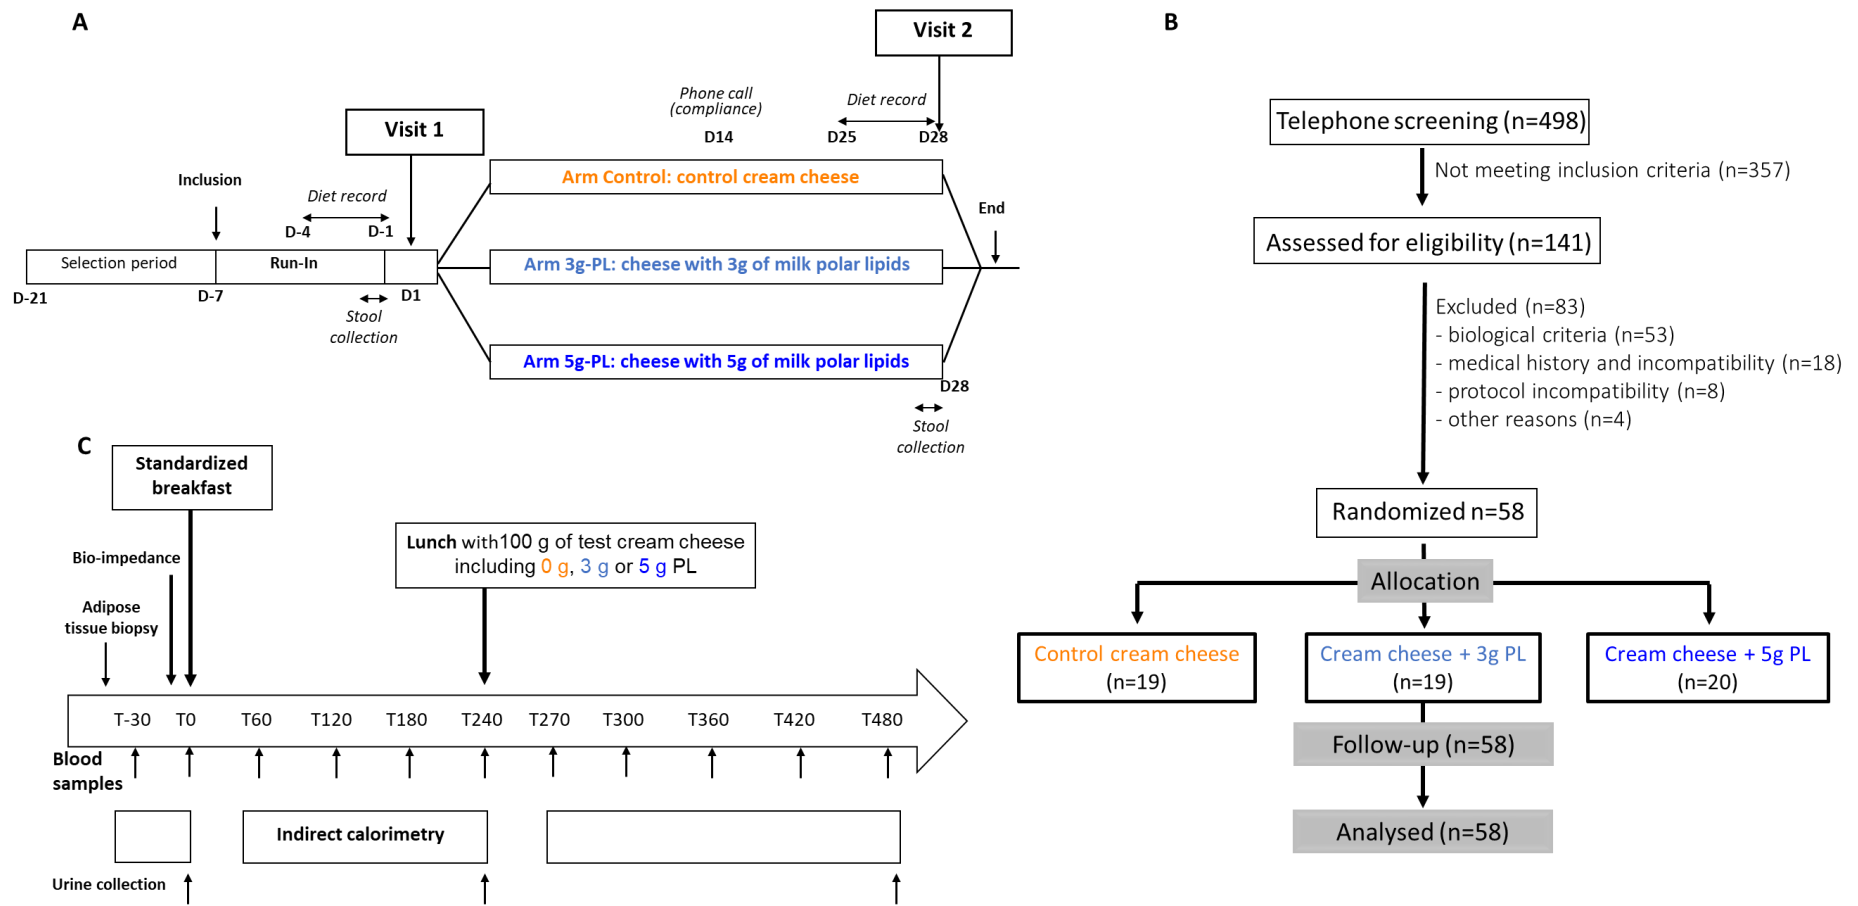

**Supplementary figure S1. Study design and flow diagram of the VALOBAB-C trial.** (A) Scheme of the intervention testing the metabolic impact of 4-week intervention with milk-PL enriched cream cheese in postmenopausal women. (B) CONSORT flow diagram of the VALOBAB-C trial in postmenopausal women. (C) Design of the metabolic exploration days performed both at the first visit (V1) and second visit (V2, 4 weeks after V1, at the end of the dietary intervention) of the VALOBAB-C trial.

**A 4 ileostomy participants**

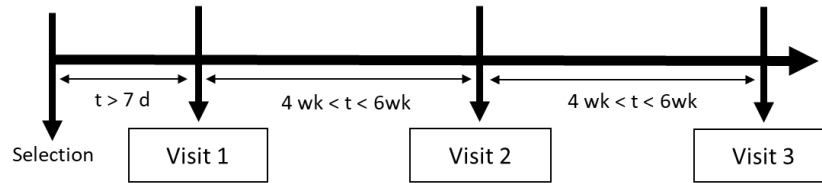

**B**

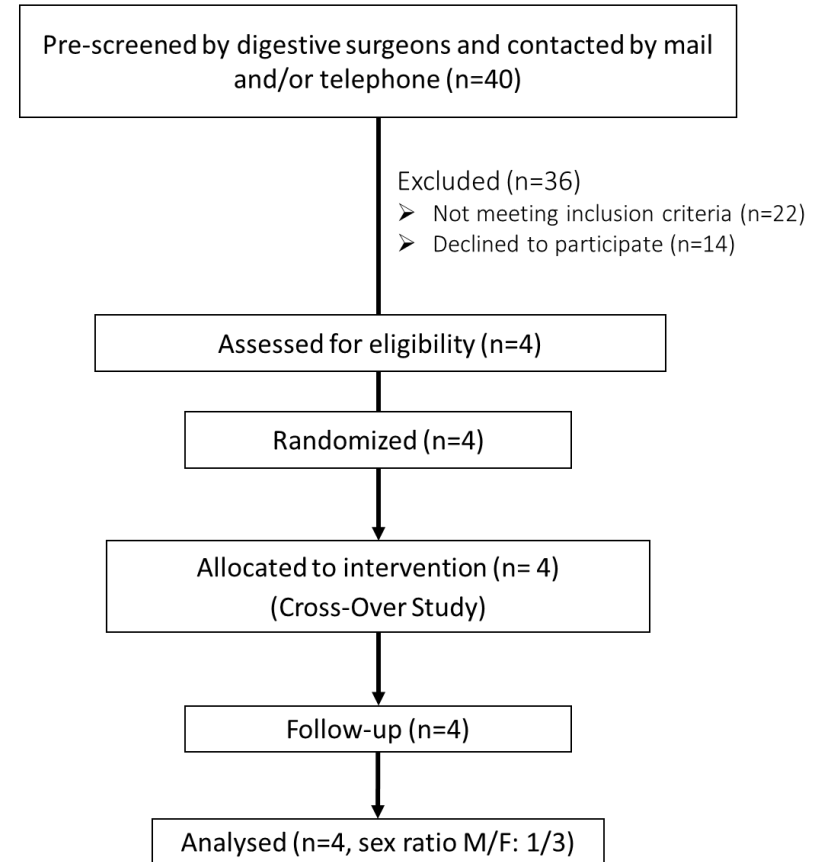

**C**

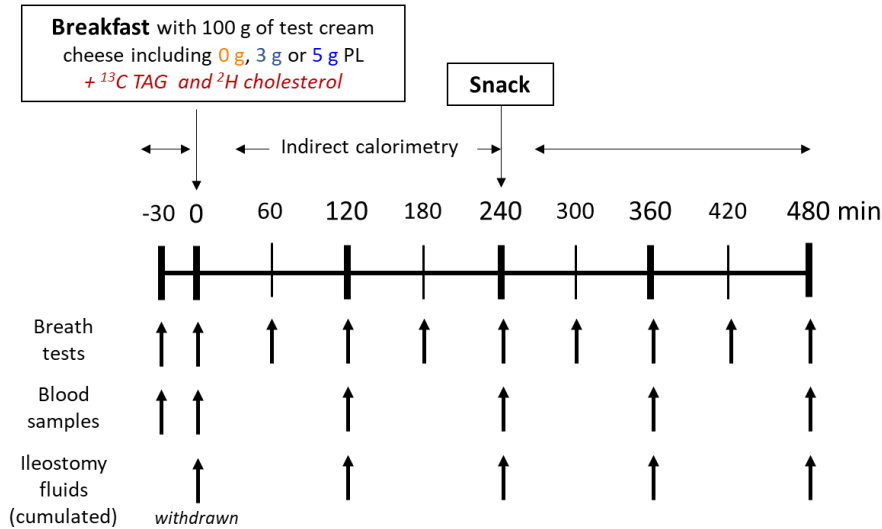

**Supplementary figure S2. Study design and flow diagram of the VALOBAB-D trial.** (A) Scheme of the cross-over postprandial trial testing the digestion of meal with milk-PL enriched cream cheese in ileostomy subjects. (B) CONSORT flow diagram of the VALOBAB-D trial in ileostomy participants. (C) Design of the metabolic exploration days performed with each of the 3 cheeses (0g, 3g or 5g milk PL) in the VALOBAB-D trial.

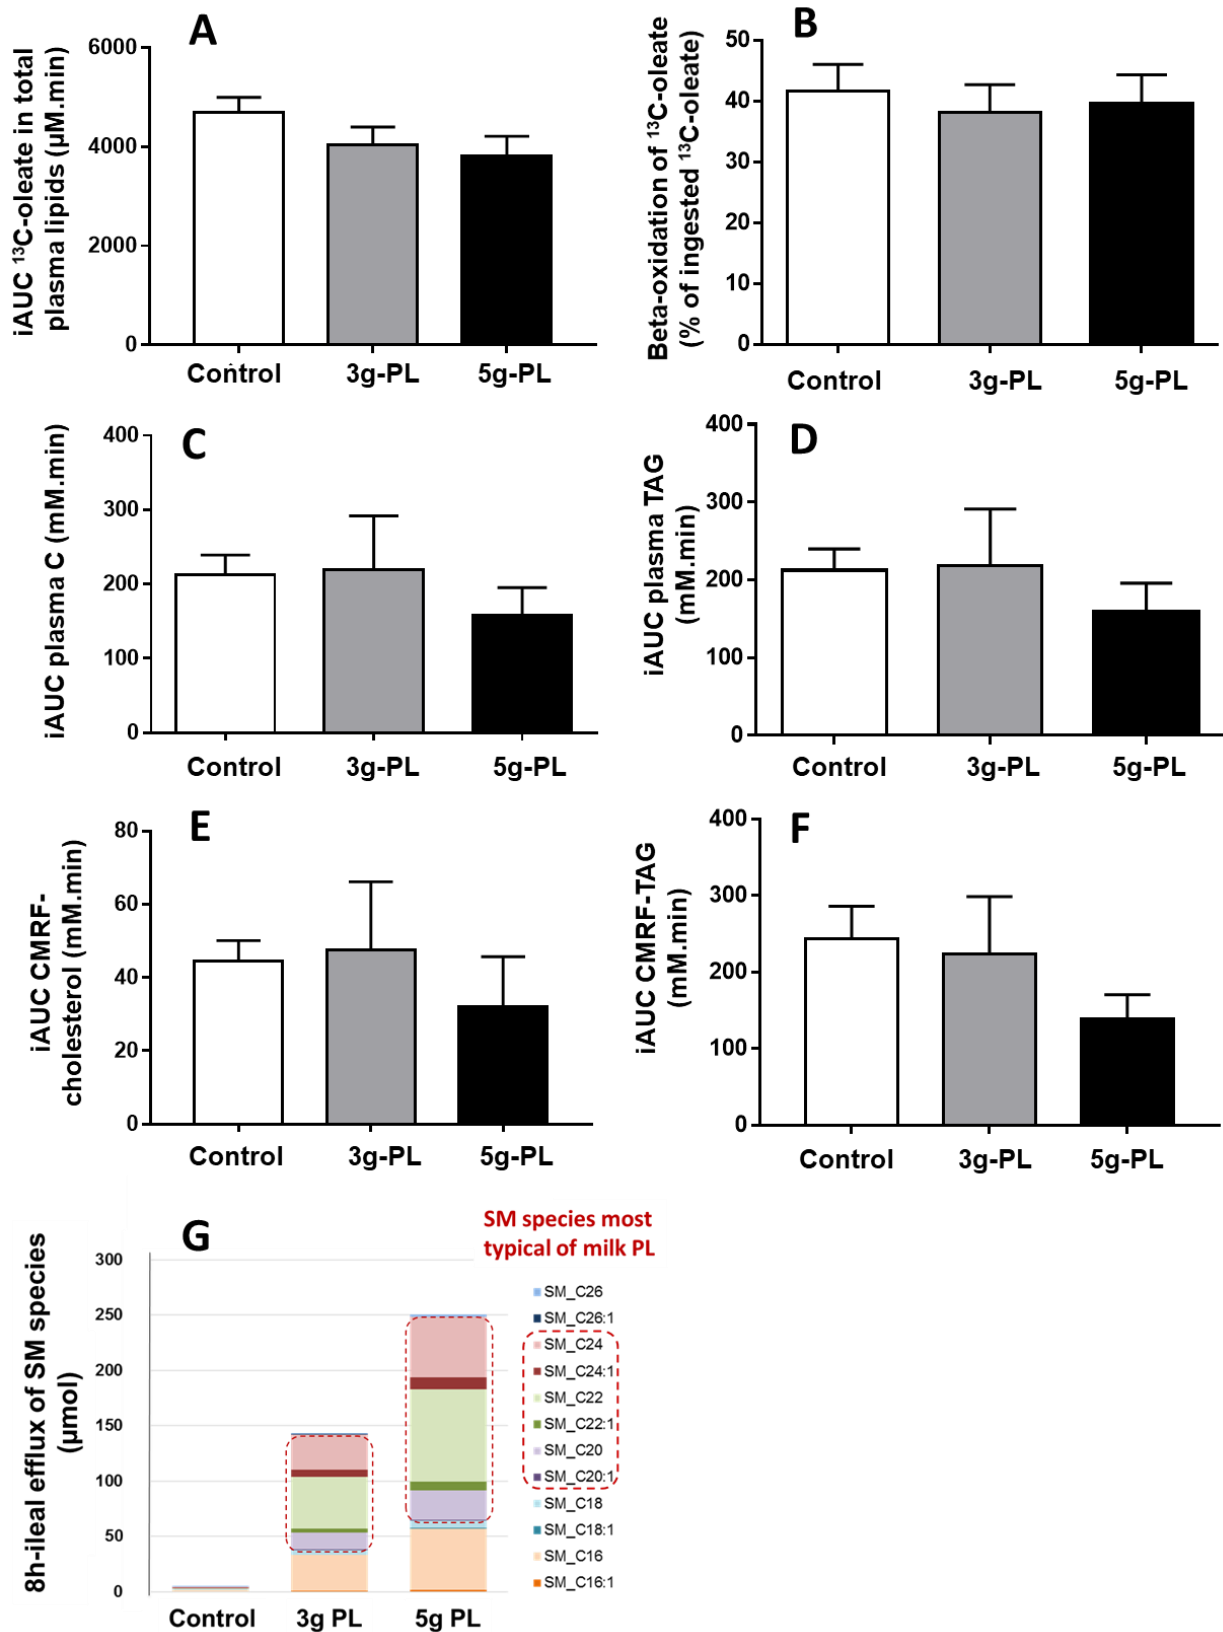

**Supplementary figure S3.** (A-F) Postprandial fate of <sup>13</sup>C-oleate tracer and postprandial accumulation of total cholesterol and triglycerides in plasma and chylomicrons in the VALOBAB-D trial (all  $p_{meal} > 0.1$ ): (A) Incremental AUC (iAUC) of <sup>13</sup>C-oleate in plasma total lipids over 8h, (B) fraction of ingested <sup>13</sup>C-oleate that was beta-oxidized after 8h according to breath test, (C) iAUC of plasma cholesterol over 8h, (D) iAUC of plasma triglycerides over 8h, (E) iAUC of cholesterol of the chylomicron-rich fraction over 8h and (F) iAUC of triglycerides of the chylomicron-rich fraction over 8h. Data are mean  $\pm$  SEM. (G) Composition of sphingomyelin molecular species in the 8h-ileal efflux in VALOBAB-D trial.
