# Supplementary material for: Milk polar lipids reduce lipid cardiovascular risk factors in overweight postmenopausal women: towards a gut sphingomyelin-cholesterol interplay
Source: PubMed Central journal article supplement — Gut. 2019 Jun 12;69(3):487–501. doi: 10.1136/gutjnl-2018-318155 (PMC7034342; doi:10.1136/gutjnl-2018-318155), 2019-06-12
Supplement: gutjnl-2018-318155supp003.pdf [file gutjnl-2018-318155supp003.pdf]

**Supplementary table S1. Cream cheese composition per 100 g of product<sup>1</sup>.**

|                        |                               | <b>Control</b>        | <b>3g-PL</b>                  | <b>5g-PL</b>                  |
|------------------------|-------------------------------|-----------------------|-------------------------------|-------------------------------|
| <b>Dry extract (g)</b> |                               | 34.38 ±0.38           | 34.06 ±0.17                   | 34.14 ±0.09                   |
| <b>Proteins (g)</b>    |                               | 15.26 ±0.21           | 15.10 ±0.07                   | 15.18 ±0.05                   |
| <b>Lipids</b>          | Total                         | 12.90 ±0.25           | 13.24 ±0.30                   | 13.48 ±0.29                   |
| - Including:           | <b>Polar lipids (g)</b>       | <b>ND<sup>2</sup></b> | <b>3.09 ±0.15<sup>4</sup></b> | <b>5.18 ±0.32<sup>4</sup></b> |
|                        | -Sphingomyelin (g)            | ND <sup>2</sup>       | 0.78 ±0.06                    | 1.31 ±0.12                    |
|                        | Triglycerides (g)             | 12.86 ±0.26           | 10.06 ±0.27                   | 8.18 ±0.09                    |
|                        | SFA (g)                       | 7.56 ±0.60            | 6.13 ±0.24                    | 5.25 ±0.39                    |
|                        | <i>cis</i> -MUFA (g)          | 2.82 ±0.12            | 2.6 ±0.06                     | 2.62 ±0.15                    |
|                        | <i>cis</i> -PUFA (g)          | 0.23 ±0.02            | 0.32 ±0.01                    | 0.40 ±0.03                    |
|                        | Cholesterol <sup>3</sup> (mg) | 38.88 ±0.90           | 89.72 ±2.82                   | 119.20 ±3.53                  |
| <b>Lactose (g)</b>     |                               | 3.71 ±0.04            | 3.77 ±0.06                    | 3.80 ±0.09                    |
| <b>Ash (g)</b>         |                               | 1.67 ±0.08            | 1.79 ±0.02                    | 1.91 ±0.07                    |
| <b>Salt (g)</b>        |                               | 1.05 ±0.03            | 1.03 ±0.01                    | 1.04 ±0.00                    |

Data are presented as mean ±SEM.

<sup>1</sup> Resulted from five different batches of cream cheese production.

<sup>2</sup> Content of polar lipids was below the detection limit (<0.11g/100g of product); sphingomyelin (SM) was thus also undetectable.

<sup>3</sup> Total cholesterol content of the product (including free cholesterol and cholesteryl esters).

<sup>4</sup> Cream cheese PL content beyond the 5-month shelf life was 3.05 ±0.11 g/100g in 3g-PL cheeses and 5.02 ±0.22 g/100g in 5g-PL cheeses.

MUFA: monounsaturated fatty acids; ND: not detectable; PL: polar lipids; PUFA: polyunsaturated fatty acids; SFA: saturated fatty acids.

**Supplementary table S2. Nutritional composition of the standardized test meals in the VALOBAB-C and VALOBAB-D trials.**

|                                                         | Quantity<br>(g or mL) | Proteins<br>(g) | Lipids<br>(g)     | Carbohydrates<br>(g) |
|---------------------------------------------------------|-----------------------|-----------------|-------------------|----------------------|
| <b>VALOBAB-C: standardized breakfast</b>                |                       |                 |                   |                      |
| Croissant (x2)                                          | 80                    | 5.7             | 21.5              | 33.7                 |
| Chocolate/hazelnut spread                               | 30                    | 1.6             | 8.7               | 17.1                 |
| Jam                                                     | 30                    | 0.1             | 0.1               | 16.3                 |
| Coffee or tea                                           | 250                   | 0.0             | 0.0               | 0.0                  |
| Total quantity (g)                                      | 390                   | 7.4             | 30.3              | 67.1                 |
| Energy (kcal)                                           | 571                   | 30              | 273               | 268                  |
| % of energy                                             |                       | 5.2             | 47.8              | 47.0                 |
| <b>VALOBAB-C: lunch including test cream cheese</b>     |                       |                 |                   |                      |
| Bread                                                   | 50                    | 4.3             | 0.7               | 28.7                 |
| Cooked Fish                                             | 100                   | 19.7            | 6.5               | 4                    |
| Pastas                                                  | 200                   | 7.9             | 1.2               | 47                   |
| Compote                                                 | 100                   | 0.2             | 0.1               | 17                   |
| Cream cheese <sup>1</sup>                               | 100                   | 12.6            | 12.7 <sup>2</sup> | 2.5                  |
| Total quantity (g)                                      | 550                   | 44.7            | 21.2              | 99.2                 |
| Energy (kcal)                                           | 767                   | 179             | 191               | 397                  |
| % of energy                                             |                       | 23.3            | 24.9              | 51.8                 |
| <b>VALOBAB-D: breakfast including test cream cheese</b> |                       |                 |                   |                      |
| Cream cheese <sup>1</sup>                               | 100                   | 12.6            | 12.7 <sup>2</sup> | 2.5                  |
| Bread                                                   | 50                    | 4.3             | 0.7               | 28.7                 |
| Jam                                                     | 30                    | 0.1             | 0.1               | 16.3                 |
| Butter                                                  | 10                    | 0.1             | 8.3               | 0.1                  |
| Coffee or tea                                           | 250                   | 0.0             | 0.0               | 0.0                  |
| [1,1,1 - <sup>13</sup> C <sub>3</sub> ]- triolein       | 0.30                  | 0.0             | 0.30              | 0.0                  |
| [2,2,3,4,4,6 - D <sub>6</sub> ]- cholesterol            | 0.045                 | 0.0             | 0.045             | 0.0                  |
| Total quantity (g)                                      | 440.3                 | 17.1            | 22.1              | 47.6                 |
| Energy (kcal)                                           | 457                   | 68              | 199               | 190                  |
| % of energy                                             |                       | 14.9            | 43.5              | 41.6                 |

| <b>VALOBAB-D: standardized snack</b> |       |      |     |       |
|--------------------------------------|-------|------|-----|-------|
| Pastas (plain, no egg)               | 100   | 4.8  | 0.8 | 29.8  |
| Bread                                | 50    | 4.3  | 0.7 | 28.7  |
| Compote                              | 100   | 0.3  | 0.2 | 22    |
| Yoghurt 0%                           | 250   | 11   | 0.4 | 20    |
| Sugar                                | 10    | 0.0  | 0.0 | 10    |
| Total quantity (g)                   | 510.0 | 20.4 | 2.1 | 110.5 |
| Energy (kcal)                        | 543   | 82   | 19  | 442   |
| % of energy                          |       | 15.0 | 3.5 | 81.5  |

<sup>1</sup> Theoretical composition for each macronutrient; the precise composition of the test cream cheese resulting from the different batches is presented in Table 2.

<sup>2</sup> Including 0, 3 or 5g of polar lipids.

**Supplementary table S3. Summary of the sample collection and analysis scheme in both centres in VALOBAB-C intervention trial.**

| <b>Analysis type</b>                       | <b>Centre 1 <sup>1</sup></b> | <b>Centre 2 <sup>2</sup></b> |
|--------------------------------------------|------------------------------|------------------------------|
| Anthropometric and biometric data          | x                            | x                            |
| Dietary survey analysis                    | x                            | x                            |
| Plasma lipids and metabolites              | x                            | x                            |
| Gut microbiota                             | x                            | x                            |
| Chylomicron collection and analysis        | x                            |                              |
| Faecal lipids, cholesterol and coprostanol | x <sup>3</sup>               |                              |
| Short-chain fatty acids in faeces          |                              | x <sup>4</sup>               |

<sup>1</sup> Group size in Centre 1: Control n=9, 3g-PL n=9, 5g-PL n=10.

<sup>2</sup> Group size in Centre 2: Control n=10, 3g-PL n=10, 5g-PL n=10.

<sup>3</sup> For technical reasons: Control n=4-7, 3g-PL n=7-8, 5g-PL n=7-9.

<sup>4</sup> For technical reasons: Control n=8, 3g-PL n=7, 5g-PL n=8.

**Supplementary table S4. Anthropometric and fasting metabolic characteristics of ileostomy subjects randomized into the VALOBAB-D trial at screening.**

|                               | n = 4      |
|-------------------------------|------------|
| Age (y)                       | 43 ±8      |
| Sex ratio (M/F)               | 1/3        |
| Body weight (kg)              | 65.9 ±7.7  |
| BMI (kg/m <sup>2</sup> )      | 25.4 ±2.0  |
| Waist circumference (cm)      | 86.8 ±4.4  |
| Hip circumference (cm)        | 99.5 ±3.5  |
| Waist/hip circumference ratio | 0.87 ±0.02 |
| Systolic BP (mmHg)            | 114.3 ±9.6 |
| Diastolic BP (mmHg)           | 74.5 ±1.3  |
| Total C (mmol/L)              | 3.8 ±0.4   |
| LDL-C (mmol/L)                | 2.4 ±0.2   |
| HDL-C (mmol/L)                | 1.4 ±0.2   |
| TAG (mmol/L)                  | 1.5 ±0.4   |
| Glucose (mmol/L)              | 4.3 ±0.2   |
| ASAT (IU/L)                   | 30.0 ±6.1  |
| ALAT (IU/L)                   | 29.0 ±5.5  |

Data are presented as mean ±SEM.

ALAT: alanine amino transferase; ASAT: alanine aspartate transferase; BMI: body mass index; BP: blood pressure; C: cholesterol; HDL: high-density lipoprotein; IU: international unit; LDL: low-density lipoprotein; TAG: triacylglycerol.

**Supplementary table S5. Daily self-reported food intake in the VALOBAB-C trial.** Intake was reported the 4 days before (V1) and after (V2) 4 weeks of consumption of 100 g cream cheese/day with or without PL.

|                                | Control (n=19) |              | 3g PL (n=19)  |               | 5g PL (n=20)  |              | P <sub>group</sub> |
|--------------------------------|----------------|--------------|---------------|---------------|---------------|--------------|--------------------|
|                                | V1             | ΔV2-V1       | V1            | ΔV2-V1        | V1            | ΔV2-V1       |                    |
| <b>All foods except cheese</b> |                |              |               |               |               |              |                    |
| Energy (kcal)                  | 1576.6 ±92.1   | 22.4 ±66.6   | 1530.5 ±69.4  | -21.5 ±52.8   | 1815.1 ±76.0  | -117.6 ±95.7 | 0.40               |
| Protein (% TEI)                | 18.02 ±0.91    | -0.71 ±0.81  | 16.69 ±0.63   | -0.18 ±0.95   | 16.75 ±0.65   | 0.49 ±0.55   | 0.55               |
| Fat (% TEI)                    | 28.97 ±0.88    | -0.11 ±1.10  | 28.79 ±1.21   | 0.26 ±1.29    | 30.87 ±1.42   | -0.65 ±1.28  | 0.87               |
| Carbohydrates (% TEI)          | 49.54 ±1.40    | 1.07 ±1.46   | 50.79 ±1.26   | 0.21 ±1.16    | 48.43 ±1.65   | 0.25 ±1.25   | 0.87               |
| Simple sugars (g)              | 69.04 ±4.65    | 2.24 ±3.32   | 65.26 ±5.54   | 3.63 ±4.54    | 79.01 ±5.40   | 0.49 ±4.31   | 0.86               |
| Fibres (g)                     | 18.06 ±1.01    | 0.12 ±1.16   | 17.51 ±1.00   | -1.23 ±0.90   | 19.72 ±1.07   | -0.83 ±1.11  | 0.66               |
| Cholesterol (mg)               | 224.53 ±20.10  | 41.53 ±25.57 | 266.18 ±32.12 | -32.26 ±40.67 | 302.81 ±33.71 | -0.67 ±36.18 | 0.34               |
| Alcohol (% TEI)                | 0.63 ±0.31     | -0.42 ±0.25  | 0.73 ±0.26    | -0.16 ±0.32   | 1.17 ±0.40    | -0.06 ±0.29  | 0.66               |
| SFAs (g)                       | 18.22 ±1.63    | 0.01 ±1.38   | 18.77 ±1.77   | -1.29 ±1.54   | 21.75 ±1.84   | 0.04 ±1.78   | 0.80               |
| MUFAs (g)                      | 18.79 ±1.83    | -0.05 ±2.02  | 18.99 ±1.47   | -1.32 ±1.48   | 23.77 ±1.86   | -3.18 ±2.13  | 0.51               |
| PUFAs (g)                      | 7.75 ±0.68     | 0.27 ±0.94   | 7.15 ±0.57    | 0.97 ±0.78    | 10.40 ±0.77   | -1.82 ±0.93  | 0.07               |

Data are presented as mean ±SEM.

p<sub>group</sub> represents p-value associated with group effect as calculated by generalized linear model. *P* values after adjustment for clinical centre, quartiles of volunteer age and waist circumference were also not significant (>0.05). MUFA: monounsaturated fatty acid; PL: polar lipids; PUFA: polyunsaturated fatty acid; SFA: saturated fatty acid; TEI: total energy intake.
